# Supplementary material
Source: PubMed Central journal article supplement (PMC6583077)
Supplement: jamaneurol-76-800-s001.pdf [file jamaneurol-76-800-s001.pdf]

## Supplementary Online Content

Kokkinos V, Sisterson ND, Wozny TA, Richardson RM. Association of closed-loop brain stimulation neurophysiological features with seizure control among patients with focal epilepsy *JAMA Neurol*. Published online April 15, 2019. doi:10.1001/jamaneurol.2019.0658

**eFigure.** Electrographic Seizure Patterns Relative to the Onset of the First RNS Stimulation Pulse

**eTable 1.** Patients, Closed-Loop Stimulation Effects, and Outcomes

**eTable 2.** Temporal Evolution of Direct and Indirect Modulation Effects

This supplementary material has been provided by the authors to give readers additional information about their work.

**eFigure. Electrographic Seizure Patterns Relative to the Onset of the First RNS Stimulation Pulse**

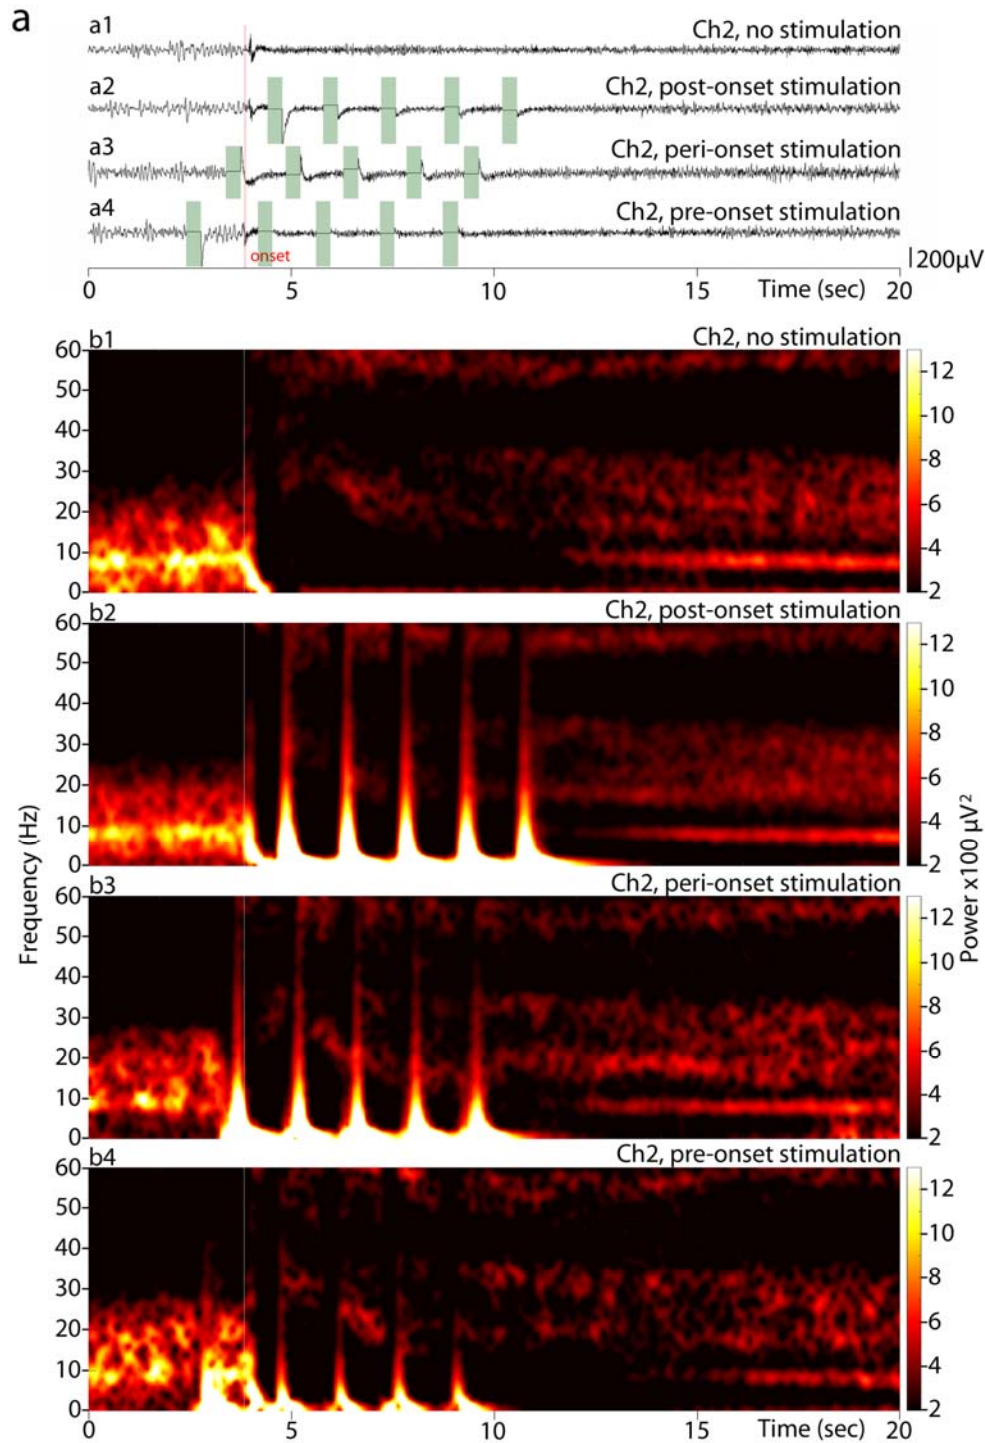

Visual evaluation of the ESP across patients resulted in four major clusters, regarding the relative timing between the onset and the application of the first stimulation pulse: (a) Raw RNS-derived ECOGs of patient 2 showing the post-onset, perionset and preonset stimulated electrographic events (a2-a4), along with a nonstimulated event for reference (a1). (b) Averaged time-frequency power graphs corresponding respectively to the above clusters of the raw ECOGs. Only the former two electrographic seizure pattern categories (nonstimulated and postonset stimulated events) were included and considered for processing in this study. Electrographic seizure pattern events with peristimulus and prestimulus onset were not dealt with, in order to maintain both the homogeneity of samples and the accuracy of the spectral averaging processes.

**eTable 1. Patients, Closed-Loop Stimulation Effects, and Outcomes**

| PATIENT | AGE | SEX | IMPLANTATION                      |        | DIRECT STIMULATION EFFECTS     |                                   | INDIRECT STIMULATION EFFECTS         |                                   |                                   |                                 |                                    | OUTCOME (ENGL SCALE)                         |
|---------|-----|-----|-----------------------------------|--------|--------------------------------|-----------------------------------|--------------------------------------|-----------------------------------|-----------------------------------|---------------------------------|------------------------------------|----------------------------------------------|
|         |     |     | SITES & PATHOLOGY                 | MONTHS | DIRECT INHIBITION (Onset week) | FREQUENCY MODULATION (Onset week) | SPONTANEOUS ATTENUATION (Onset week) | FREQUENCY MODULATION (Onset week) | COARSE FRAGMENTATION (Onset week) | FINE FRAGMENTATION (Onset week) | MEAN SEIZURE DURATION (Onset week) |                                              |
| 1       | 21  | M   | R Fronto-parietal PMG             | 6      | X                              | X                                 | X                                    | Y (w0)                            | X                                 | X                               | X                                  | IIB<br>SF: 98.2%<br>SS: 33.3%<br>SD: 0.0%    |
| 2       | 44  | F   | L Basal-temporal AVM              | 22     | Y (w28)                        | Y (w21)                           | X                                    | X                                 | X                                 | X                               | X                                  | IVB<br>SF: 0.0%<br>SS: 0.0%<br>SD: 0.0%      |
| 3       | 24  | F   | B Mesial-temporal<br>No lesion    | 13     | Y (w20)                        | X                                 | X                                    | X                                 | X                                 | X                               | X                                  | IVB<br>SF: 0.0%<br>SS: 0.0%<br>SD: 0.0%      |
| 4       | 40  | F   | B Mesial-temporal<br>No lesion    | 10     | X                              | Y (w2)                            | X                                    | X                                 | X                                 | X                               | X                                  | IVB<br>SF: 0.0%<br>SS: 0.0%<br>SD: 0.0%      |
| 5       | 29  | M   | R Fronto-parietal PMG/Heterotopia | 5      | X                              | Y (w5)                            | X                                    | Y (w9)                            | X                                 | X                               | Y ↓ (w3)                           | IIB<br>SF: 72.3%<br>SS: 8.8%<br>SD: 20.0%    |
| 6       | 24  | F   | B Mesial-temporal<br>No lesion    | 15     | X                              | X                                 | X                                    | X                                 | X                                 | Y (w60)                         | X                                  | IVA<br>SF: 0.0%<br>SS: 26.3%<br>SD: 15.7%    |
| 7       | 36  | F   | R Mesial-frontal<br>No lesion     | 19     | X                              | X                                 | X                                    | Y (w1)                            | X                                 | X                               | Y ↓ (w12)                          | IB<br>SF: 100.0%<br>SS: 100.0%<br>SD: 100.0% |
| 8       | 40  | F   | L Fronto-parietal Heterotopia     | 9      | Y (w4)                         | X                                 | X                                    | Y (w20)                           | Y (w19)                           | X                               | X                                  | IIIA<br>SF: 90.0%<br>SS: 81.8%<br>SD: 92.7%  |

|    |    |   |                                    |    |           |   |           |   |           |   |              |                                              |
|----|----|---|------------------------------------|----|-----------|---|-----------|---|-----------|---|--------------|----------------------------------------------|
| 9  | 32 | M | B Mesial-temporal<br>No lesion     | 8  | X         | X | X         | X | X         | X | Y ↑<br>(w7)  | IVC<br>SF: -11.4%<br>SS: 6.6%<br>SD: 50.0%   |
| 10 | 65 | F | B Temporal<br>No lesion            | 13 | Y<br>(w5) | X | X         | X | Y<br>(w8) | X | Y ↓<br>(w53) | IB<br>SF: 100.0%<br>SS: 100.0%<br>SD: 100.0% |
| 11 | 49 | F | B Occipito-temporal<br>Heterotopia | 26 | X         | X | Y<br>(w9) | X | X         | X | Y ↓<br>(w81) | IIIA<br>SF: 66.7%<br>SS: 77.7%<br>SD: 50.0%  |

Patients, closed-loop stimulation effects, and outcomes (Y: present, X: not present, ↑ = decrease, ↓ = increase, R: right, L: left, B: bilateral; Onset weeks refer to the time an effect was first observed after activation of RNS stimulation; Percentages in the Engel scale column represent reported reduction in seizure frequency (SF), severity (SS), and duration (SD)).

**eTable 2. Temporal Evolution of Direct and Indirect Modulation Effects**

| PATIENTS   | EFFECT TYPE                   | PE1 (weeks)      | PE 2 (weeks)    | PE3 (weeks)      | PE4 (weeks)      | PE5 (weeks)      | PE6 (weeks)      | PE7 (weeks)      | PE8 (weeks)       | PE9 (weeks)        |
|------------|-------------------------------|------------------|-----------------|------------------|------------------|------------------|------------------|------------------|-------------------|--------------------|
| Patient 1  | Indirect frequency modulation | w1-w16<br>100%   | w16-w24<br>100% | n/a              | n/a              | n/a              | n/a              | n/a              | n/a               | n/a                |
| Patient 2  | Direct inhibition             | w5-w16<br>0%     | w16-w26<br>0%   | w26-w46<br>3%    | w46-64<br>0%     | w64-w73<br>0%    | w73-w97<br>5%    | n/a              | n/a               | n/a                |
|            | Direct frequency modulation   | w5-w16<br>0.0%   | w16-w26<br>100% | w26-w46<br>100%  | w46-64<br>100%   | w64-w73<br>100%  | w73-w97<br>100%  | n/a              | n/a               | n/a                |
| Patient 3  | Direct inhibition             | w4-w9<br>0.0%    | w9-w20<br>2%    | w20-w29<br>15%   | w29-w38<br>9%    | w38-w47<br>2%    | w47-w56<br>9%    | n/a              | n/a               | n/a                |
| Patient 4  | Direct frequency modulation   | w2-w16<br>100.0% | w16-w24<br>100% | w24-w31<br>100%  | w31-w45<br>100%  | n/a              | n/a              | n/a              | n/a               | n/a                |
| Patient 5  | Direct frequency modulation   | w2-w22<br>50%    | n/a             | n/a              | n/a              | n/a              | n/a              | n/a              | n/a               | n/a                |
|            | Indirect frequency modulation | w2-w22<br>50%    | n/a             | n/a              | n/a              | n/a              | n/a              | n/a              | n/a               | n/a                |
|            | Seizure duration modulation   | w2-w22<br>100%   | n/a             | n/a              | n/a              | n/a              | n/a              | n/a              | n/a               | n/a                |
| Patient 6  | Fine fragmentation            | w5-w16<br>0%     | w16-w34<br>0%   | w34-w43<br>0%    | w43-w66<br>40%   | n/a              | n/a              | n/a              | n/a               | n/a                |
| Patient 7  | Indirect frequency modulation | w5-w11<br>100%   | w11-w15<br>100% | w15-w19<br>100%  | w19-w24<br>100%  | w24-w62<br>100%  | w62-w71<br>100%  | w71-w86<br>100%  | n/a               | n/a                |
|            | Seizure duration modulation   | w5-w11<br>0%     | w11-w15<br>25%  | w15-w19<br>60%   | w19-w24<br>50%   | w24-w62<br>69%   | w62-w71<br>73%   | w71-w86<br>79%   | n/a               | n/a                |
| Patient 8  | Direct inhibition             | w3-w19<br>44%    | w19-w28<br>42%  | w28-w43<br>38%   | n/a              | n/a              | n/a              | n/a              | n/a               | n/a                |
|            | Indirect frequency modulation | w3-w19<br>0%     | w19-w28<br>0%   | w28-w43<br>7%    | n/a              | n/a              | n/a              | n/a              | n/a               | n/a                |
|            | Coarse fragmentation          | w3-w19<br>0%     | w19-w28<br>19%  | w28-w43<br>43%   | n/a              | n/a              | n/a              | n/a              | n/a               | n/a                |
| Patient 9  | Seizure duration modulation   | w5-w14<br>71%    | w14-w23<br>100% | w23-w37<br>100%  | n/a              | n/a              | n/a              | n/a              | n/a               | n/a                |
| Patient 10 | Direct inhibition             | w3-w19<br>4%     | w19-w24<br>8%   | w24-w30<br>4%    | w30-w43<br>6%    | w43-w54<br>1%    | w54-w90<br>1%    | w90-w105<br>1%   | n/a               | n/a                |
|            | Coarse fragmentation          | w3-w19<br>2%     | w19-w24<br>1%   | w24-w30<br>2%    | w30-w43<br>5%    | w43-w54<br>21%   | w54-w90<br>70%   | w90-w105<br>28%  | n/a               | n/a                |
|            | Seizure duration modulation   | w3-w19<br>0%     | w19-w24<br>0%   | w24-w30<br>0.00% | w30-w43<br>0%    | w43-w54<br>4%    | w54-w90<br>3%    | w90-w105<br>3%   | n/a               | n/a                |
| Patient 11 | Spontaneous attenuation       | w3-w7<br>0%      | w7-w16<br>8%    | w16-w27<br>7%    | w27-w42<br>13%   | w42-w62<br>17%   | w62-w71<br>10%   | w71-w80<br>20%   | w80-w98<br>4%     | w98-w112<br>10%    |
|            | Seizure duration modulation   | w3-w7<br>0.00%   | w7-w16<br>0.00% | w16-w27<br>0.00% | w27-w42<br>0.00% | w42-w62<br>0.00% | w62-w71<br>0.00% | w71-w80<br>0.00% | w80-w98<br>28.57% | w98-w112<br>30.00% |

Temporal evolution of direct and indirect modulation effects. The presence of each effect is quantified as a percentage of the total number of electrographic seizure patterns identified per programming epoch (PE) (n/a = not available).
